# Supplementary material for: The Relationship between Lymphocyte Subsets and the Prognosis and Genomic Features of Lung Cancer: A Retrospective Study
Source: PubMed Central journal article supplement (PMC8040422; doi:10.7150/ijms.56928), 2021-03-25
Supplement: ijmsv18p2228s1.pdf [file ijmsv18p2228s1.pdf]

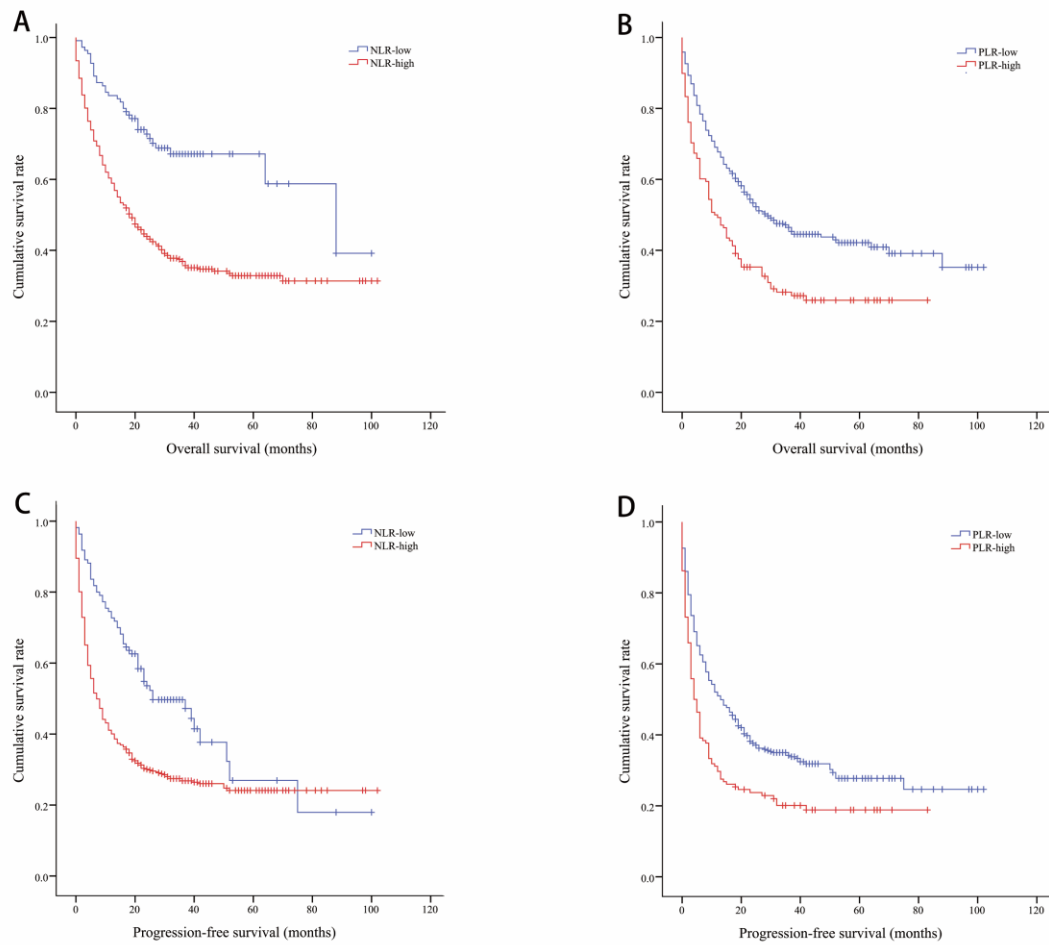

**Figure S1** Kaplan-Meier curves showing overall survival and progression-free survival by NLR and PLR. Curves showed overall survival by NLR (A), PLR (B). Curves showed progression survival by NLR (C), PLR (D).

NLR, neutrophil-to-lymphocyte ratio; PLR, platelet-to-lymphocyte ratio.

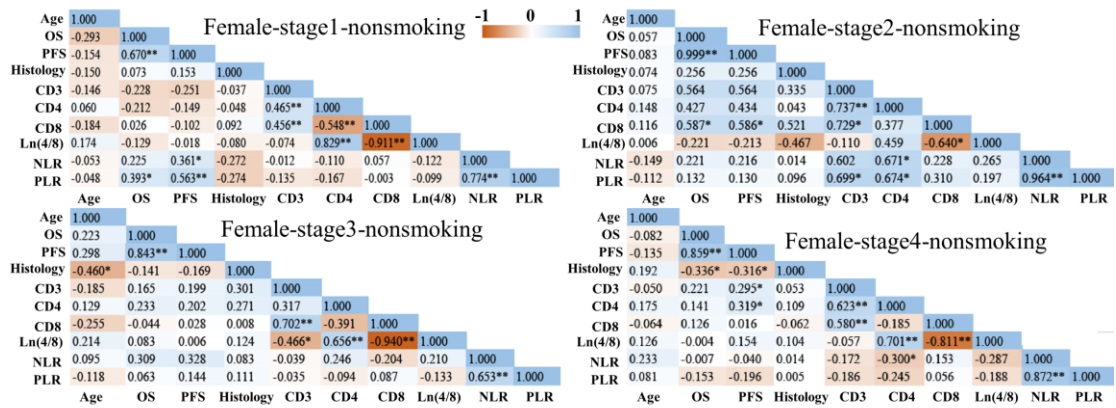

**Figure S2** The correlation between indicators and prognosis in nonsmoking female lung cancer patients

\*\* : There was a significant correlation at the 0.01 level (bilateral); \* : There was a significant correlation at the 0.05 level (bilateral).

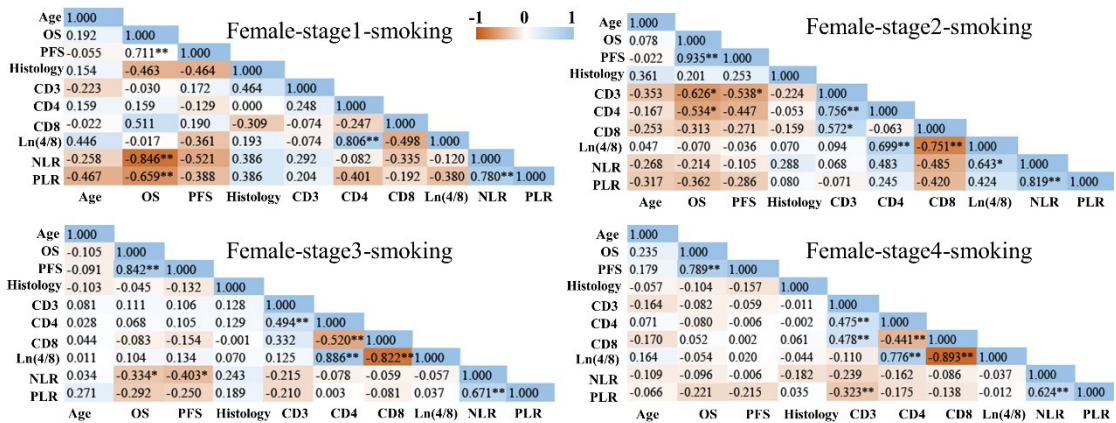

**Figure S3** The correlation between indicators and prognosis in smoking female lung cancer patients

\*\* : There was a significant correlation at the 0.01 level (bilateral); \* : There was a significant correlation at the 0.05 level (bilateral).

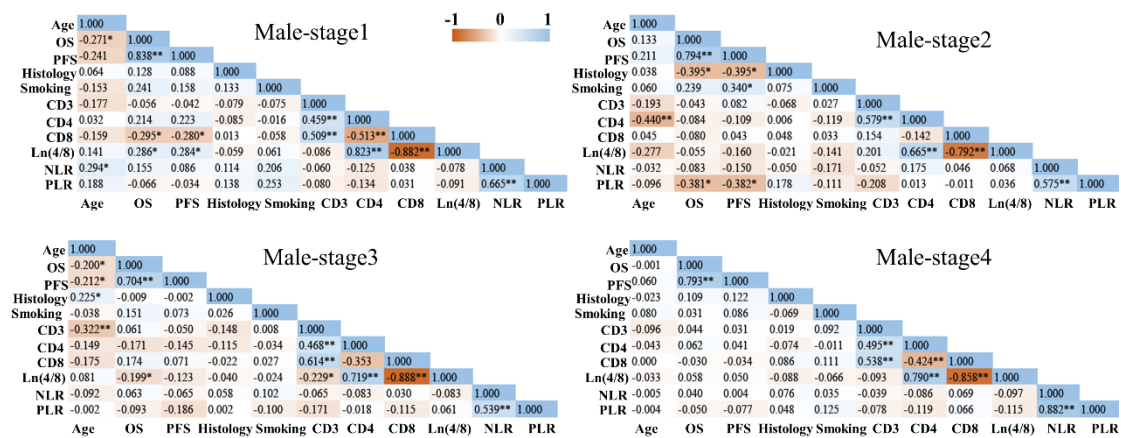

**Figure S4** The correlation between indicators and prognosis in male lung cancer patients

\*\* : There was a significant correlation at the 0.01 level (bilateral); \* : There was a significant correlation at the 0.05 level (bilateral).
